# Supplementary material
Source: PubMed Central journal article supplement (PMC3413318)
Supplement: NIHMS396749-supplement-Supplementary_Information.pdf [file NIHMS396749-supplement-Supplementary_Information.pdf]

## SUPPLEMENTARY INFORMATION

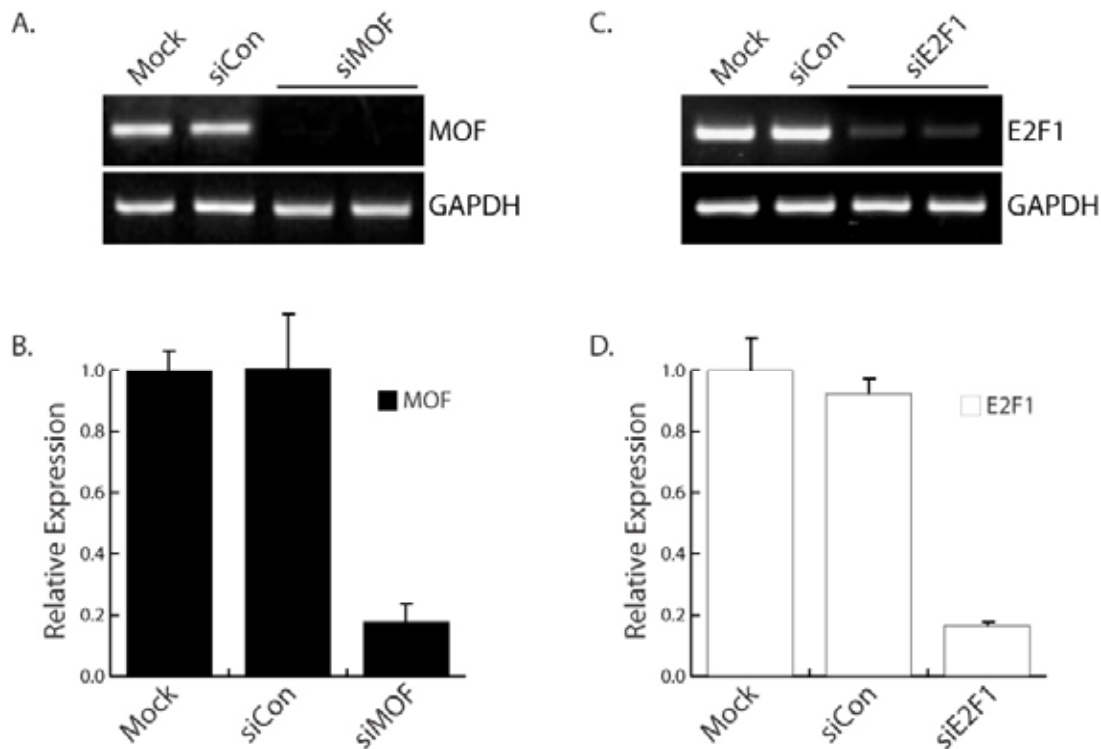

**Supplementary Fig. (1). Efficient knockdown of MOF and E2F1 by RNAi.** (A) PC-3 cells were transfected at 50 nM siCon or siMOF for 72 hours. Mock treatments were transfected in the absence of siRNA. MOF and GAPDH mRNA levels were assessed by standard RT-PCR. GAPDH served as a loading control. (B) Relative expression of MOF was determined by real-time PCR (mean  $\pm$  standard error from three independent experiments). Values of MOF were normalized to GAPDH. (C) PC-3 cells were transfected at 50 nM siCon or siE2F1 for 72 hours. E2F1 and GAPDH transcript levels were assessed by standard RT-PCR. (D) Relative expression of E2F1 was determined by real-time PCR (mean  $\pm$  standard error from three independent experiments).

**Supplementary Table 1. Duplex RNAs and Oligonucleotide Sequences**

| <b>saRNA/siRNA</b>     | <b>Sequence (5' - 3')*</b>        |
|------------------------|-----------------------------------|
| siMOF S                | GUGAUCCAGUCUCGAGUGAUU             |
| siMOF AS               | UCACUCGAGACUGGAUCACUU             |
| siE2F1 S               | UGGACUCUUCGGAGAACUU [dT] [dT]     |
| siE2F1 AS              | AAGUUCUCCGAAGAGUCCA [dT] [dT]     |
| siAgo1 S               | GAGAAGAGGUGCUCAAGAA [dT] [dT]     |
| siAgo1 AS              | UUCUUGAGCACCUCUUCUC [dT] [dT]     |
| siAgo2 S               | GCACGGAAGUCCAUCUGAA [dT] [dT]     |
| siAgo2 AS              | UUCAGAUGGACUUCGUGC [dT] [dT]      |
| siAgo3 S               | GAAAUUAGCAGAUUGGUAA [dT] [dT]     |
| siAgo3 AS              | UUACCAAUCUGCUAAUUUC [dT] [dT]     |
| siAgo4 S               | GGCCAGAACUAAUAGCAAU [dT] [dT]     |
| siAgo4 AS              | AUUGCUAUUAGUUCUGGCC [dT] [dT]     |
| siCon S                | UUCUCCGAACGUGUCACGU [dT] [dT]     |
| siCon AS               | ACGUGACACGUUCGGAGAA [dT] [dT]     |
| dsEcad-215 S           | AACCGUGCAGGUCCCAUAA [dT] [dT]     |
| dsEcad-215 AS          | UUAUGGGACCUGCACGGUU [dT] [dT]     |
| dsP21-322 S            | CCAACUCAUUCUCCAAGUA [dT] [dT]     |
| dsP21-322 AS           | UACUUGGAGAAUGAGUUGG [dT] [dT]     |
| dsControl S            | ACUACUGAGUGACAGUAGA [dT] [dT]     |
| dsControl AS           | UCUACUGUCACUCAGUAGU [dT] [dT]     |
| dsEcad-215-S-5'Bio S   | Bio-AACCGUGCAGGUCCCAUAA [dT] [dT] |
| dsEcad-215-S-5'Bio AS  | UUAUGGGACCUGCACGGUU [dT] [dT]     |
| dsEcad-215-AS-5'Bio S  | AACCGUGCAGGUCCCAUAA [dT] [dT]     |
| dsEcad-215-AS-5'Bio AS | Bio-UUAUGGGACCUGCACGGUU [dT] [dT] |
| dsP21-322-S-5'Bio S    | Bio-CCAACUCAUUCUCCAAGUA [dT] [dT] |
| dsP21-322-S-5'Bio AS   | UACUUGGAGAAUGAGUUGG [dT] [dT]     |

|                                                           |                                                                          |
|-----------------------------------------------------------|--------------------------------------------------------------------------|
| dsP21-322-AS-5'Bio S<br>dsP21-322-AS-5'Bio AS             | CCAACUCAUUCUCCAAGUA [dT] [dT]<br>Bio-UACUUGGAGAAUGAGUUGG [dT] [dT]       |
| dsEcad-215-S-MM S<br>dsEcad-215-S-MM AS                   | AACCGUGCAGGUCCCAUAA [dT] [dT]<br>UUAUGGGACCUGCACGGUA [dT] [dT]           |
| dsEcad-215-AS-MM S<br>dsEcad-215-AS-MM AS                 | AACCGUGCAGGUCCCAUAU [dT] [dT]<br>UUAUGGGACCUGCACGGUU [dT] [dT]           |
| dsP21-322-S-MM S<br>dsP21-322-S-MM AS                     | CCAACUCAUUCUCCAAGUA [dT] [dT]<br>UACUUGGAGAAUGAGUUGC [dT] [dT]           |
| dsP21-322-AS-MM S<br>dsP21-322-AS-MM AS                   | CCAACUCAUUCUCCAAGUU [dT] [dT]<br>UACUUGGAGAAUGAGUUGG [dT] [dT]           |
| dsP21-322-AS-5'Bio-S-MM S<br>dsP21-322-AS-5'Bio-S-MM AS   | CCAACUCAUUCUCCAAGUU [dT] [dT]<br>Bio-UACUUGGAGAAUGAGUUGG [dT] [dT]       |
| dsP21-322-S-2'OMe S<br>dsP21-322-S-2'OMe AS               | CCAACUCAmUmUCUCCAAGUA [dT] [dT]<br>UACUUGGAGAAUGAGUUGG [dT] [dT]         |
| dsP21-322-AS-2'OMe S<br>dsP21-322-AS-2'OMe AS             | CCAACUCAUUCUCCAAGUA [dT] [dT]<br>UACUUGGAmGmAAUGAGUUGG [dT] [dT]         |
| dsEcad-215-3'Bio S<br>dsEcad-215-3'Bio AS                 | AACCGUGCAGGUCCCAUAA [dT] [dT] -Bio<br>UUAUGGGACCUGCACGGUU [dT] [dT] -Bio |
| dsEcad-215-S-5'Bio-AS-MM S<br>dsEcad-215-S-5'Bio-AS-MM AS | Bio-AACCGUGCAGGUCCCAUAU [dT] [dT]<br>UUAUGGGACCUGCACGGUU [dT] [dT]       |
| <b>RT-PCR Primers</b>                                     | <b>Sequence (5' - 3')</b>                                                |
| E-cadherin S<br>E-cadherin AS                             | CCTGGGACTCCACCTACAGA<br>GGATGACACAGCGTGAGAGA                             |
| p21 S<br>p21 AS                                           | GCCCAGTGGACAGCGAGCAG<br>GCCGGCGTTTGGAGTGGTAGA                            |
| MOF S<br>MOF AS                                           | ATCCACATCGGGA ACTACGA<br>TCTTTGCCATCAACTTCGTG                            |

|                              |                                                            |
|------------------------------|------------------------------------------------------------|
| E2F1 S                       | CATCTATGACATCACCAACGTC                                     |
| E2F1 AS                      | GCTTTGATCACCATAACCATCT                                     |
| Ago1 S                       | GCGAATTGGGAAGAGTGGTA                                       |
| Ago1 AS                      | GCAGGTGCTGGGATAGAGAC                                       |
| Ago2 S                       | CGCGTCCGAAGGCTGCTCTA                                       |
| Ago2 AS                      | TGGCTGTGCCTTGTA AACGCT                                     |
| Ago3 S                       | ATCCCAGCTGGAACAACAGT                                       |
| Ago3 AS                      | GCGTACGTAAGTGTGGCAGA                                       |
| Ago4 S                       | GGGTAGGGAAAAGTGGCAAT                                       |
| Ago4 AS                      | GAGCGAGTGCACCTCACATA                                       |
| GAPDH S                      | TCCCATCACCATCTTCCA                                         |
| GAPDH AS                     | CATCACGCCACAGTTTCC                                         |
| <b>pMIR Insert Sequences</b> | <b>Sequence (5' - 3')</b>                                  |
| pOffTar S                    | CTAGTAGATCTTGTGTGTGTGTTATGGGACCTGCA<br>CGGTTGAACATACACA    |
| pOffTar AS                   | AGCTTGTGTATGTTCAACCGTGCAGGTCCCATAAC<br>ACACACACAAGATCTA    |
| pNonSpec S                   | CTAGTAGATCTTGTGTGTGTGGGTAGGCGTCAAGT<br>AGATAGCGAACATACACA  |
| pNonSpec AS                  | AGCTTGTGTATGTTTCGCTATCTACTTGACGCCTAC<br>CCACACACACAAGATCTA |

\*Bio: biotin, m: 2'-O-Methyl
